# Supplementary material for: Slope Unit Maker (SUMak): an efficient and parameter-free algorithm for delineating slope units to improve landslide susceptibility modeling
Source: Copernicus journal article supplement (doi:10.5194/nhess-2023-70), 2023-05-05
Supplement: Supplementary file [file nhess-2023-70-AC2-supplement.pdf]

Below we have responded to each comment made by the reviewer. The reviewer's comments are in bold, and our responses are in roman text. Changes we have made to the original text are in italics.

**The manuscript nness-2023-70 proposed for publication in NHESS describes a new algorithm for slope unit delineation. Slope units are a well-known terrain subdivision type in the landslide research community; the topic of the manuscript is well within the aims & scope of the Journal. The authors make a good case about the use of slope units in landslide susceptibility mapping. They describe the advantages of using slope units in conjunction with statistical methods, discussing the use of heterogeneous data, landslide inventories of varying quality, data inaccuracies, and drawbacks of using grid cells.**

We thank the reviewer for their thorough and thoughtful comments and are pleased that they appreciate the importance of our manuscript.

**The paper is intentionally split into a rather technical part, about the outcomes of the software introduced here, and an application part, about use of slope units for landslide susceptibility mapping. I have two main general comments about those parts, and a few specific comments that I will list afterwards.**

**The main issue in the technical part in my opinion is that it is rather focused on the comparison of the outcome and, above all, speed of the new software with respect to the existing r.slopeunits software by Alvioli et al. I believe the way this part is presented is a bit misleading, because it makes assumptions and comparisons that may be not entirely justified. My understanding is that the main difference between the two pieces of work are that the previous one require parametric inputs, while the one presented here only gives one possible result, with no additional parameters. (The new software is not described in detail, so it is difficult to be more specific on the input requirements). Because of this difference the authors stress in several occasions that the existing software has much larger computational demands, and it has "prohibitive" processing times. In an explicit comparison of the outputs of the two software in Sicily (a part of Italy where the slope unit map were published by the r.slopeunit team) the authors of the new software estimated the processing and optimization time based on the total running time quoted in the original paper for the entire Italy, scaling it down proportionally to the size of the area. I felt that as an unfair comparison and, being myself a user of r.slopeunits, it was easy to run the software a couple of times with different values of the input parameters (on the same 25 m EU-DEM). The two runs required 100 minutes and 140 minutes with typical values of parameters I usually input, using a maximum of about 2GB of RAM, on a single computing core (a rather outdated CPU, to tell the truth). To compare with the computing time quoted by the authors of the new software (7 hours), who used 16 computing cores, running about 48 instances of r.slopeunits if would require three times that; say, an average of about  $120 \times 3 = 360$  minutes. Thus in four hours one could have done about 48 runs, and picked up the "best" one, within the criteria developed by the r.slopeunit team. I would say that the difference is mostly due to the fact that the quoted processing time in the previous paper was due to a rather complicated optimization algorithm, taking into account a huge number of runs and some peculiar arrangement of optimization spatial domains. Then I**

would go on and say that this is not a fair comparison either, because the outputs of the two pieces of software seem very different, judging from figure 1 in the manuscript: one can clearly see that the slope units obtained with the new software are different from the existing ones, and to be honest I can hardly say that they provide a comparable accuracy in segmenting the sub-areas: one can see areas with very similar morphological setting that are split into tiny details by SUMak, where the previous delineation looks more "reasonable". There probably are areas with the opposite situation, even if they are more difficult to spot. So, different output, different computing times and rather different flexibility - the possibility of having different outputs with different input requirements looks like an advantage, in my opinion, because it gives the possibility of tuning the map to one's needs. In conclusion, and in essence, my suggestion is either to substantially improve the comparison part (I will not suggest to try and compare with other methods - even if I believe other methods exist that were defined as parameter-free by their respective authors), or to reduce its relative importance in the manuscript, in favour of the practical application part.

The reviewer is correct that the use of r.slopeunits is a valid approach in circumstances where the user is not concerned about obtaining the optimum sizing of the slope units in the study area or when a custom optimization function is desired. However, slope units are often delineated and chosen at an arbitrary scale that reduces reproducibility and complicates the utility of slope units as a mapping unit for landslide susceptibility analysis. The reviewer is also correct that it is the optimization procedure and cleaning algorithm used by Avlioli et al. (2020) that drastically increased the computational time for delineating slope units over Italy. However, as argued by Alvioli et al. (2020) this optimization procedure is critical. They state, "Identifying the correct scale of a particular spatial analysis is a way out from what is known as modifiable areal unit problem (Openshaw (1984); Manley (2014)). Any study associated with the use of data aggregated within geographical areas is prone to the MAUP, and an objective link between mapping units and the underlying topography is highly desirable."

To address the reviewer's point, we have augmented the introduction to better highlight the importance of the proper scaling of slope units. The second to last paragraph of the introduction now reads as follows:

*The correct scaling (size) of slope units should not be arbitrarily set to avoid the modifiable areal unit problem (MAUP) (Openshaw and Taylor, 1983; Buzzelli, 2020; Goodchild, 2011). The MAUP occurs when the cartographic representation of data varies significantly by the scale of the mapping unit used to represent the data. MAUP is a challenging issue to overcome. However, determining a scale of the slope units so that they effectively capture the hillslope processes of interest can greatly mitigate the negative effects of the MAUP (Buzzelli, 2020). Alvioli et al. (2020) recognized this challenge, which motivated the development of their custom optimization procedure. Importantly, the optimal scale for capturing hillslope processes is spatially variant. Thus, the ideal scaling of slope units should adjust to the local topography.*

We also agree that the comparison to r.slopeunits is ancillary to the main objectives of the paper. We have removed this portion of the methods and results in favor of a paragraph in the results

that describes the speed and other specifications of our algorithm without the in-depth comparison to r.slopeunits. Section 3.1 now reads as follows:

### 3.1 SUMak Slope Unit Delineation

*SUMak is able to quickly delineate slope units over the three study areas while automatically adapting the scaling of the slope units by the local terrain. Table 1 shows the time to delineate each of the study areas. Both Oregon watersheds were delineated in only a few minutes while the island of Puerto Rico took substantially longer. This is due to the larger area and the increased complexity of the delineating watersheds near coastlines where watersheds get increasingly small due to decreased accumulation areas. The adaptation of the slope unit sizes to the local topography is apparent in the slope unit maps (Figures S4, 1-2). For example, the Calapooia Watershed includes a mountainous and flat region (Figure 1). SUMak created smaller slope units over the flat region compared to the mountainous region to accommodate the difference in scale where hillslope processes occur (Figure S4).*

**Table 1.** SUMak performance metrics.

| <i>Location</i>    | <i>Area (km<sup>2</sup>)</i> | <i>Coastline</i> | <i>DEM Resolution (m)</i> | <i>Compute Time (minutes)</i> | <i>Slope Unit Count</i> | <i>Time per area (seconds/km<sup>2</sup>)</i> | <i>Time per Slope unit (seconds)</i> |
|--------------------|------------------------------|------------------|---------------------------|-------------------------------|-------------------------|-----------------------------------------------|--------------------------------------|
| <i>Umpqua</i>      | 257                          | <i>No</i>        | 10                        | 3.11                          | 3841                    | 0.7                                           | 0.05                                 |
| <i>Calapooia</i>   | 743                          | <i>No</i>        | 10                        | 9.97                          | 6990                    | 0.8                                           | 0.09                                 |
| <i>Puerto Rico</i> | 8870                         | <i>Yes</i>       | 10                        | 383.28                        | 140367                  | 2.6                                           | 0.16                                 |

**The authors proposed two applications of the slope unit maps produced with the new software, in two different areas. The two applications are substantially different: in the one case (actually two, in Oregon, USA), they authors use landslide data collected over decades, and the the other case (island of Puerto Rico) landslides were all caused by a hurricane - thus, a specific event. I believe that many would question the use of an event-based landslide inventory to map landslide susceptibility, without mentioning the necessary caveats. In fact - if we agree that landslide susceptibility is the spatial component of landslide hazard - it is difficult to fit an event-based map within this definition. While a "generic", or "historical" landslide inventory actually tells something about the different likelihood of landslides to occur at different locations in a study area, an event-based landslide inventory clearly does a very different job. This is very clear from the maps obtained in the two areas, with statistical methods; but this is in contradiction with the statement "statistical models analyze the spatial distribution of known landslides in relation to local terrain condition", because there no terrain condition alone can explain the landslide distribution in figure 3, and the susceptibility map in figure 5. The authors stated all of this in one line (228), just mentioning that they included soil moisture data as an additional predictor. This singles out the map obtained from the event data as something different from a susceptibility map. For example, in a few papers, this was done**

**using shake maps to account for a trigger in co-seismic landslides. There, the ground shaking parameters are interpreted somewhat as a dynamical input; examples are in Nowicki et al. (10.1016/j.enggeo.2014.02.002) and in Tanyas et al. (10.1016/j.geomorph.2018.10.022). In conclusion, I believe this aspect has been overlooked by the authors of the proposed manuscript, and it should be discussed in some detail as the different interpretation and purpose of the results is not obvious. Another, related point is the repeated reference to the absence of a time component in input data; how would it change the outcome? That would require a totally different framework, in my opinion.**

We have rewritten several portions of the text to both clarify and elaborate on the differences between Oregon and Puerto Rico examples. We included a new introductory paragraph that explains the difference between the two datasets. It reads as follows:

*Another tool used to mitigate losses associated with landslides are near real-time or forecasted assessment of event-specific landslide occurrence models (Nowicki Jesse et al., 2018; Nowicki et al., 2014; Tanyas et al., 2019; Kirschbaum and Stanley, 2018). Rather than characterizing the potential of landslide existence from static terrain conditions, these models include a dynamic input designed to characterize landslide potential from a particular forcing event. For example, Tanyas et al. (2019), analyzed the static terrain conditions and dynamic ground motion metrics (e.g., peak ground velocity) from 25 earthquake-induced landslide-event inventories from across the world to create a landslide model that can estimate the distribution of landslides during an earthquake. Herein, we will refer to this model type as landslide occurrence models. Like susceptibility models, landslide occurrence models often suffer from imperfect and heterogeneous landslide data. Thus, a common problem in the landslide community is determining an effective way of assessing landslide susceptibility and/or occurrence, despite the imperfect data available for model development.*

The first paragraph of section 2.2 now reads, in part, as follows:

Several papers have evaluated the relative effectiveness of slope units over grid mapping units in statistical landslide susceptibility models (Jacobs et al., 2020; Steger et al., 2017; Zêzere et al., 2017; Van Den Eeckhaut et al., 2009; Martinello et al., 2022). However, none of these studies has thoroughly evaluated the effectiveness of slope units for better *visualizing the imprecise* susceptibility model output caused by inconsistent input data or their advantages in displaying *near real-time or forecasted landslide occurrence* maps. To demonstrate these benefits, we use the Middle Umpqua and Calapooia 10-digit hydrologic unit code (HUC) watersheds (U.S. Geological Survey, 2004) in the State of Oregon (U.S.) and the island of Puerto Rico which have areas of 257 km<sup>2</sup>, 743 km<sup>2</sup>, and 8,870 km<sup>2</sup>, respectively. *Each area's landslide catalog includes an assortment of landslide types (slumps, debris flows, rockfalls, deep-seated landslides, and others) which are not differentiated in this study.* The landslide data from the Oregon were collected over decades using a combination of 1-m DEM data and its derivatives, geologic maps, orthophotos, aerial photography, and field reconnaissance and consists of both point and polygon data (Burns and Madin, 2009). *The Oregon landslide catalogs contains no temporal constraints on landslide occurrence. The Umpqua dataset contains 941 points and 3213 polygons, while the Calapooia dataset contains 33 points and 456 polygons.* In this dataset, polygons cover the extent of the landslide affected area while points are placed at the centroid of the landslide

affected areas. All data were reviewed for accuracy after their initial mapping. The areas of the individual landslides mapped using polygons are highly variable, spanning  $2 \times 10^6$ - $4.4 \times 10^6$  m<sup>2</sup> and  $1500 - 1.88 \times 10^7$  m<sup>2</sup> in Umpqua and Calapooia, respectively. This data variability can lead to problems when using grid mapping units because the landslide data is standardized to a consistent format for the creation of the landslide susceptibility models. The Puerto Rico landslide dataset consists of 71,431 point locations of the centers of landslide headscarps that occurred during Hurricane Maria on September 20-21, 2017 (Hughes et al., 2019). *Headscarps were manually identified using high-resolution (15-50 cm), post-event imagery and quality checked by three experienced supervisors. Importantly, the output of the landslide models for Puerto Rico are not a susceptibility map, rather a landslide occurrence map. That is, the models output the probability of a landslide occurring during Hurricane Maria. This type of output is similar to the landslide models developed for near real-time or forecasted assessment of event-specific landslides (Nowicki Jessee et al., 2018; Nowicki et al., 2014; Tanyas et al., 2019; Kirschbaum and Stanley, 2018). Our example from Hurricane Maria is intended to show how event-specific model outputs might differ between slope unit and pixel-based assessments.* Thus, the Oregon watersheds and Puerto Rico datasets are used to demonstrate the benefits of slope units when using inconsistent and event-based input data, respectively.

The second to last paragraph of section 2.2. now reads, in part, as follows:

*For the two Oregon watersheds, the probability output of each method is used as a measure of landslide susceptibility. In contrast, the Puerto Rico probability outputs are the probability of landslide occurrence during Hurricane Maria.*

The second to last paragraph of section 4 now reads as follows:

Slope units also provide a more conservative output for event-based landslide susceptibility maps that may be more effective at communicating the likelihood of landslide *occurrence* over large regions. Like the maps created using non-temporal landslide datasets, the grid-based susceptibility maps created for Puerto Rico show fine-scale variations in *landslide probability* that may be too precise to accurately reflect *landslide occurrence*. Figure S15, shows a zoomed in portion of the model results and illustrates the diversity in probability values in the grid-based map compared to the slope unit map within a relatively small, mountainous terrain. The grid-based Puerto Rico landslide models are attempting to specify the pixel that contains the center of the head scarp. This level of precision may be too high and cause the model to miss *the location of landslides induced by hurricane Maria or overpredict potential locations*. In contrast, the slope unit maps characterize the susceptibility of the entire hillslope and thus provide a more conservative output *that better generalizes the location of hurricane-induced landslides. In near real-time landslide occurrence products (Nowicki Jessee et al., 2018; Nowicki et al., 2014; Tanyas et al., 2019; Kirschbaum and Stanley, 2018), larger mapping units that conform to the actual topography will facilitate more informative and useful model outputs for decision makers to prioritize resources after landslide-inducing events.*

Finally, we have made several minor changes to the text to avoid confusion of the uses of the two maps.

The references to input data often missing a time component was intended to exemplify the vague character of most landslide catalogs used to create landslide susceptibility maps. We believe that our previous adjustments to the text have resolved the reviewer's last point in this general comment.

### **Minor or not-so-minor comments follow.**

**As anticipated, the abstract is very unbalanced towards the computational speed of the codes, rather than on actual methods and conclusions of the proposed work. As similar comments apply in different parts of the text, I will not point to all of them - only I would like to add that one fair comment can be that regardless of the few or many hours needed to prepare a slope unit map, that is a one-time effort and processing time may be less important than other aspects.**

We have rewritten the abstract to deemphasize the computational speed comparison with other methods. We did the same for the short summary and elsewhere in the text. The abstract and short summary now read as follows.

#### **Abstract.**

Slope units are terrain partitions bounded by drainage and divide lines. *In* landslide modeling, *including susceptibility modeling and event-specific modeling of landslide occurrence, slope units provide several advantages over gridded units*, such as better capturing terrain geometry, improved incorporation of geospatial landslide-occurrence data in different formats (e.g., point and polygon), and better accommodating the varying data accuracy and precision in landslide inventories. However, the use of slope units in regional (>100 km<sup>2</sup>) landslide studies remains limited due, in part, to *the large* computational costs and/or poor reproducibility with current delineation methods. We introduce a computationally efficient algorithm for the parameter-free delineation of slope units *that leverages tools from within TauDEM and GRASS, using an R interface*. The algorithm uses geomorphic scaling laws to define the appropriate scaling of the slope units representative of hillslope processes, avoiding the *often ambiguous determination of slope unit scaling*. We then demonstrate how slope units enable more robust regional-scale landslide susceptibility *and event-specific landslide occurrence* maps.

#### **Short summary**

Dividing landscapes into representative hillslopes greatly improves predictions of landslide potential across landscapes *but their scaling is often arbitrarily set and can require significant computing power to delineate*. Here, we present a new computer program that can efficiently divide landscapes into meaningful slope units *scaled to best capture landslide processes*. The results of this work will allow an improved understanding of landslide potential across different landscapes and can ultimately help reduce the impacts of landslides worldwide.

Please see our response to your first general comment for more examples of how we have adjusted the text to comply with this suggestion.

**In section 2.1 the authors refer to the "constant drop law"; I feel it would be nice to have a bit more on this law and its meaning. In addition to a quantitative description it would be nice to explain why is the law relevant for slope unit delineation. Do hillslope processes uniquely determine slope unit boundaries, or are they more relevant to identify landslides? Are slope units produced by this criterion suited for any kind of landslides, or for a subset of them? Did the authors check that the law actually holds, in the specific areas investigated here and - more importantly - with the representation of the terrain provided by the digital elevation models adopted here? Moreover, another relevant point is - is this criterion applicable to areas of any size? This is probably the motivation behind the different optimization procedure adopted by Alvioli et al 2020 (and further refined in Alvioli et al 2021 - 10.1080/17445647.2022.2052768).**

We have rewritten section 2.1 to address the concerns about the reliability of TauDEM and the appropriateness of our selected scaling for characterizing landslide hazards. It reads as follows:

*This scaling law is independent of the raster resolution (Tarboton et al., 1991; Tarboton, 1989) and has been used extensively in the field of fluvial geomorphology. We further process these optimally scaled watersheds by splitting them by the longest flow path within the watershed using GRASS (GRASS Development Team, 2020). Thus, the watersheds essentially become what would be objectively recognized as a slope. We argue that basing the scaling of slope units used for landslide analysis on established geomorphic laws provides the best justification for their appropriate sizing and odds of mitigating the negative effects of the MAUP. Further details on how the algorithm was implemented in R are in Text S1 and the online repository (Woodard, 2023).*

Based on the extensive validation procedures conducted by the Tarboton (1989) and Tarboton et al. (1991) and the sound theoretical basis of the drop law, we do not perform further validations for our areas of interest.

The criterion is applicable to areas of any size as it will find the desired threshold for flow accumulation across area of interest. However, the size of the area of interest can alter the calculated threshold if it includes a significant variation in topographic signatures (e.g., mountains and alluvial fans). We discuss this in the second paragraph of the supplemental text 1 where we state the following:

“Creating intermediate watersheds allows the algorithm to adapt the scaling of the slope units according to the characteristics of the local topography. If the intermediate watershed has significant variation in topography, TauDEM may choose a threshold that doesn’t adequately characterize every area within the watershed. Thus, intermediate watersheds must be small enough to limit the variation in topography but large enough to avoid significantly reducing computational efficiency. While experimenting with different watershed dimensions on the topographically diverse regions of Sicily, Puerto Rico, and the Umpqua and Calapooia

watersheds, we found an accumulation threshold of ~100 km<sup>2</sup> to adequately strike this balance. This threshold can be adjusted to meet the user's needs, or SUMak has an option to input predetermined intermediate watersheds. After appropriate intermediate watersheds are created, the algorithm runs the rest of the processing steps individually for each intermediate watershed in parallel. “

**About the conversion of landslide polygons to point-like features: it is not very clear to me why this is necessary or, actually, what is the rationale of the different methods, especially converting one polygon into multiple points; I can understand using the highest elevation point as an indicator for the landslide initiation point - but what is the difference in using equally-spaced multiple points instead of all of the grid cells overlapping a landslides? Maybe I am missing something, here.**

We have revised this section to better explain our rational for using multiple points per polygon. It now reads as follows:

Creating multiple points within the polygons allows us to capture some of the variability in the large landslides' measured attributes *without eliminating the influence of landslides originally mapped as points*. Using all the raster cells within the polygons would essentially oversaturate the model with data from the landslide polygons and omit any influence of the landslides originally mapped as points.

**When introducing the XGBoost method - what is the meaning of the list of parameters (max\_depth) and most importantly how does the optimization work, in short?**

We have added a short description of the XGBoost optimization procedure. It reads as follows:

To increase the model accuracy while preventing overfitting, we optimize the 'max\_depth', 'min\_child\_weight', 'subsample', 'gamma', and 'colsample\_bytree' hyperparameters of XGBoost (see Chen & Guestrin, 2016 and <https://xgboost.readthedocs.io/> for an explanation of these parameters) using a Bayesian cross-validation procedure. *In short, these hyperparameters adjust how the model adapts to fit the training data. The Bayesian cross-validation procedure uses ten folds and ten iterations and uses the results from the previous iterations to inform the next iteration of hyperparameters to use (Snoek et al., 2012). This procedure prevents the use of unwieldy grid searches and permits faster optimization of the model hyperparameters.*

**I do not understand the sentence "the Brier score provides measure of the scale of the model fit and not just its ordering"; can the authors explain, in short?**

We rewrote this sentence to clarify our meaning. It now reads as follows:

Thus, a *B* value of zero suggests perfect model fit and a value of one indicates perfect misfit. In contrast to AUC-ROC, the Brier score provides measure of the scale of the model fit and not just its ordering of *landslide and non-landslide observations*.



As already mentioned, the method to scale down the computing time in lines 265-267 does not seem reasonable at all, for a quantitative nor qualitative comparison.

We have removed this portion of the text.

I believe the overall view of slope units in figure 1(c) is rather poor - most probably due to the attempt of showing the slope unit vector layer at that zoom scale. On similar grounds, it is kind of impossible to see anything sensible in figure 2(a)-(b). Slope units would be much more visible in figure 3(b) if they weren't colored as the higher elevation values.

We have removed figure 1 from the text to better focus the scope of the manuscript. We have also removed figure 2a,b and changed the colors of the slope units in figure 3 to facilitate visualization. The updated figures are copied below.

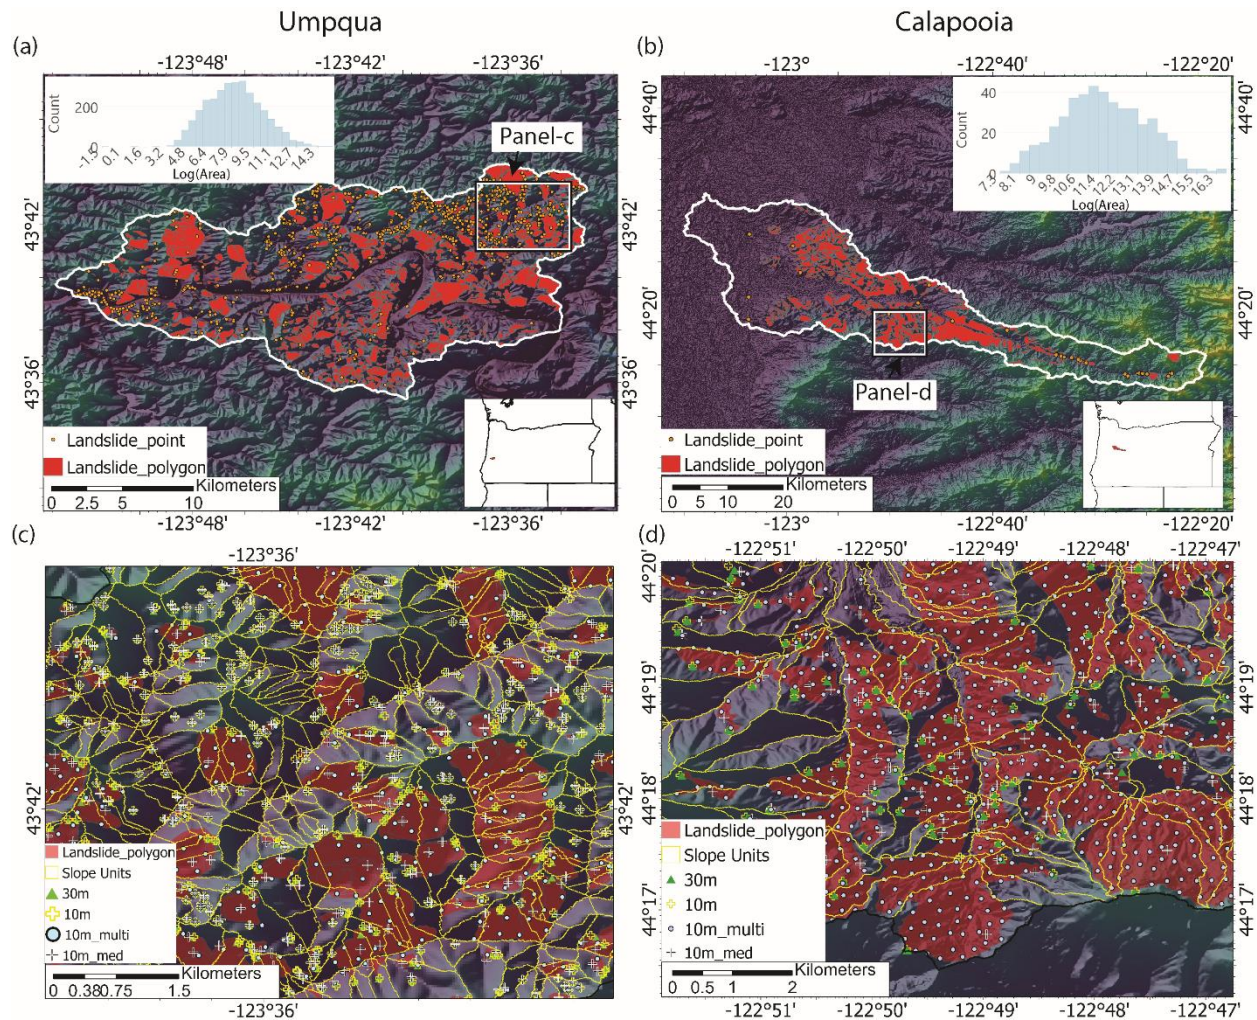

**Figure 2:** Umpqua and Calapooia watersheds in Oregon. (a, b) digital elevation models and landslide inventories. Also shown are the log-normalized histograms of the landslide polygon areas. (c, d) zoomed-in portions of the slope unit maps with landslide polygons and grid sampled

points using the four sampling techniques superimposed. The 10 m point samples often overlap the 30 m samples. Sampling techniques are described in section 2.2.

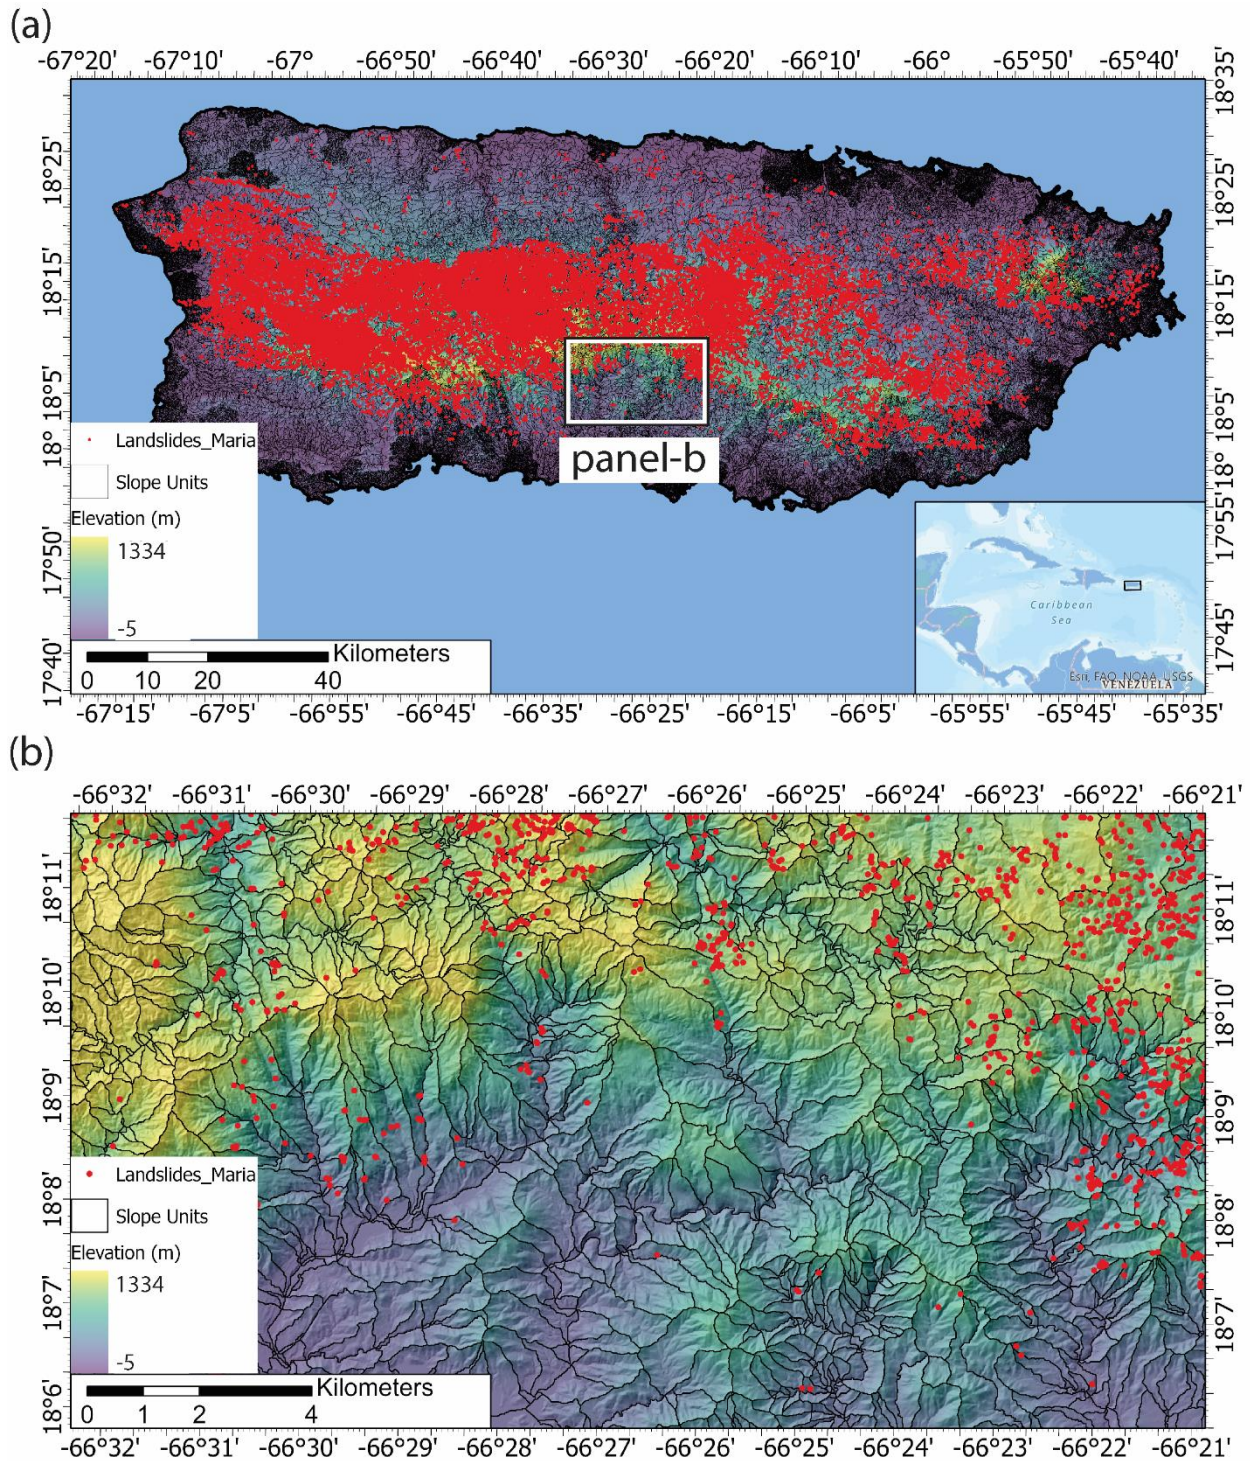

**Figure 3:** Island of Puerto Rico. (a) Slope unit delineation and mapped landslide points from Hurricane Maria. (b) Zoomed-in portion of the island.

**The discussion about the percentage of grid cells with large susceptibility values, which result in visually under-represented with respect to the number and size of landslides, is interesting. The authors ascribe that to a poor performance of methods based on grid cells, and better suitability of the slope unit approach. Could it be that the statistical methods themselves reveal their limits? The observed overall picture is seemingly typical of over-fitting, for methods with poor generalization performance.**

Yes, that is one reason why we used two different algorithms in our analysis. However, the ability of slope unit-based maps to better differentiate high and low susceptibility zones remains. To address this point, we inserted the following into the second paragraph of section 4:

*This phenomenon may partially reflect the limits of the statistical models used. However, slope units consistently produced more granular model results compared to grid-based maps independent of the model used, suggesting that this is not merely an artifact of the statistical models. The lack of granularity of the grid-based maps at the Umpqua watershed may lead some to conclude that the watershed is generally not susceptible to landsliding.*

**Despite the interesting premises set by the introduction and discussion sections, the conclusions drawn by the authors do not seem to meet the expectations (at least, my expectations). I mean, the difference between slope units vs. pixel based models has been investigated by several authors, with similar conclusions. Maybe a bit more could have been done in highlighting the role of the optimization algorithm, for the slope unit delineation part, and on the meaning of using a landslide inventory corresponding to an individual event instead of a "generic" inventory, for the susceptibility part.**

We believe that our adjustments made in response to the second minor comment and the second general point address this concern.
